# Supplementary material for: Unreliability of Clinical Prediction Rules to Exclude without Echocardiography Infective Endocarditis in Staphylococcus aureus Bacteremia
Source: MDPI journal article supplement (doi:10.3390/jcm11061502), 2022-03-09
Supplement: s1 [file s1]

Table S1: Items evaluated by PREDICT (5-day model), POSITIVE and VIRSTA scores.

| ITEM                                       |                       | PREDICT<br>(5-DAY MODEL) | POSITIVE                    | VIRSTA                   |
|--------------------------------------------|-----------------------|--------------------------|-----------------------------|--------------------------|
| ACQUISITION                                | Community             | 2 points                 | -                           | 2 points                 |
|                                            | Healthcare-associated | 1 point                  | -                           |                          |
|                                            | Nosocomial            | 0 point                  | -                           | 0 points                 |
| CARDIAC<br>DEVICES                         | Prosthetic valve      | -                        | 5 points for<br>any of them | 4 points any<br>of them  |
|                                            | Pacemaker             | 3 points                 |                             |                          |
|                                            | Defibrillator         | 2 points                 |                             |                          |
| PERSISTENT BACTEREMIA                      |                       | 2 points<br>(>72 hours)  | -                           | 3 points<br>(>48 hours)  |
| TIME TO<br>POSITIVITY                      | Less than 9 hours     | -                        | 5 points                    | -                        |
|                                            | 9-11 hours            |                          | 3 points                    |                          |
|                                            | 11-13 hours           |                          | 2 points                    |                          |
|                                            | More than 13 hours    |                          | 0 points                    |                          |
| PREEXISTING NATURAL CARDIAC PREDISPOSITION |                       | -                        | 5 points*                   | 3 points                 |
| INTRAVENOUS DRUG ABUSE                     |                       | -                        | 3 points                    | 4 points                 |
| VASCULAR PHENOMENA/EMBOLI                  |                       | -                        | 6 points                    | 5 points                 |
| PREVIOUS INFECTIVE ENDOCARDITIS            |                       | -                        | -                           | 4 points**               |
| MENINGITIS                                 |                       | -                        | -                           | 5 points                 |
| VERTEBRAL OSTEOMYELITIS                    |                       | -                        | -                           | 2 points                 |
| SEVERE SEPSIS OR SHOCK                     |                       | -                        | -                           | 1 points                 |
| C-REACTIVE PROTEIN >190MG/L                |                       | -                        | -                           | 1 points                 |
| POSSIBLE PUNCTUATION                       |                       | 0-7                      | 0-19                        | 0-20                     |
| CUT-OFF POINTS (HIGH RISK)                 |                       | Greater than<br>1 point  | Greater than<br>4 points    | Greater than<br>2 points |

\*In POSITIVE score, cardiac device, preexisting natural valve disease and other cardiac predisposition are considered as the same item: "predisposing heart disease"

\*\*In VIRSTA score, previous infective endocarditis and cardiac devices are considered as the same item: "permanent intracardiac device or previous infective endocarditis"

Table S2: Evaluation of alternative cut-off points of different clinical prediction rules to identify IE among SAB patients. IE: infective endocarditis. SAB: Staphylococcus aureus bacteriemia. Sens: sensitivity. Spec: Specificity. PPV: Positive Predictive Value. NPV: Negative Predictive Value. PLR: Positive likelihood-ratio. NLR: Negative likelihood-ratio. AUC: Area under de curve.

| Score                        | Cut-off point | Sens. | Spec. | PPV   | NPV   | NLR  | PLR  |
|------------------------------|---------------|-------|-------|-------|-------|------|------|
| <b>PREDICT (5-day model)</b> | > 0 points    | 90.0% | 31.0% | 15.9% | 95.6% | 0.32 | 1.30 |
| <b>POSITIVE</b>              | > 0 points    | 92.0% | 35.6% | 16.8% | 96.9% | 0.22 | 1.43 |
|                              | > 3 points    | 84.0% | 50.6% | 19.4% | 95.7% | 0.32 | 1.70 |
| <b>VIRSTA</b>                | > 0 points    | 94.0% | 24.0% | 14.9% | 96.5% | 0.25 | 1.24 |
|                              | > 1 point     | 94.0% | 33.6% | 16.7% | 97.5% | 0.18 | 1.42 |

Table S3: Individual characteristics of patients identified as low risk of IE by means of VIRSTA score but who finally were diagnosed of IE. IE: infective endocarditis. CIED: Cardiac implantable electronic device, PVC: peripheral venous catheter. ATB: antibiotic. TTE: transthoracic echocardiography, TEE: transesophageal echocardiography

| VARIABLE                            | Patient 1        | Patient 2        | Patient 3           | Patient 4           |
|-------------------------------------|------------------|------------------|---------------------|---------------------|
| Age (YEARS)                         | 91               | 91               | 72                  | 75                  |
| Sex                                 | Male             | Male             | Female              | Female              |
| Charlson index                      | 1                | 0                | 7                   | 0                   |
| Chronic heart failure               | No               | No               | Yes                 | No                  |
| Natural cardiac valve disease       | No               | No               | No                  | No                  |
| Prosthetic heart valve disease      | No               | No               | No                  | No                  |
| CIED                                | No               | No               | No                  | No                  |
| Hemodialysis                        | No               | No               | No                  | No                  |
| Liver cirrhosis                     | No               | No               | No                  | No                  |
| Intravenous drug user               | No               | No               | No                  | No                  |
| Previous IE                         | No               | No               | No                  | No                  |
| Acquisition                         | Nosocomial       | Nosocomial       | Nosocomial          | Community           |
| Primary source                      | PVC related      | PVC related      | Unknown*            | Unknown             |
| Symptoms duration prior to ATB      | 48 hours         | 24 hours         | 24 hours            | 48 hours            |
| Sepsis/shock                        | No               | No               | No                  | No                  |
| Fever defervescence within 48h      | Yes              | Yes              | Yes                 | Yes                 |
| Septic emboli                       | No               | No               | No                  | No                  |
| Thrombophlebitis                    | No               | No               | No                  | No                  |
| Acute cardiac failure               | No               | No               | No                  | No                  |
| Time to positivity                  | 18 hours         | 17 hours         | 13 hours            | 16 hours            |
| Persistent bacteriemia              | No               | No               | No                  | No                  |
| Early source control (if necessary) | Yes              | Yes              | Yes*                | -                   |
| TTE                                 | Positive         | Positive         | Negative            | Not done            |
| TEE                                 | Not done         | Not done         | Positive            | Positive            |
| Outcome                             | IE-related death | IE-related death | Alive<br>No relapse | Alive<br>No relapse |
| PREDICT score classification        | Low risk         | Low risk         | Low risk            | High risk           |
| POSITIVE score classification       | Low risk         | Low risk         | Low risk            | Low risk            |

\*Patient 3 had a central venous catheter which was presumed to be the probable source of infection, although it could not be demonstrate. The catheter was retired 1 week previously to symptoms onset.

Table S4: Univariate analysis of 30-day mortality in patients with no diagnosed with infective endocarditis and who survived the first 48 hours after the index blood culture extraction. Qualitative variables are expressed as percentage (absolute number) and compared by means of chi-square (or Fisher exact test when necessary). Quantitative variables are expressed as median (interquartile range) and compared by means of Mann-Whitney's U. CIED: Cardiac implantable electronic device. SAB: *Staphylococcus aureus* bacteriemia.

| Variable                                   |                       | Total (n=335) | Survivor (n=281) | Non survivor (n=54) | p      | Missing |
|--------------------------------------------|-----------------------|---------------|------------------|---------------------|--------|---------|
| <b>Demographic and comorbidity</b>         |                       |               |                  |                     |        |         |
| Age                                        |                       | 70 (56-81)    | 68 (54-80)       | 77 (64-90)          | <0.001 | 0       |
| Sex (female)                               |                       | 31.9% (107)   | 32.0% (90)       | 31.5% (17)          | 1.000  | 0       |
| Charlson index                             |                       | 2 (1-5)       | 2 (0-4)          | 4 (2-6)             | 0.001  | 2       |
| Age-adjusted Charlson index                |                       | 5 (3-7)       | 5 (2-7)          | 7 (5-8)             | <0.001 | 2       |
| Arterial hypertension                      |                       | 52.8% (177)   | 50.9% (143)      | 63.0% (34)          | 0.136  | 0       |
| Diabetes mellitus                          |                       | 27.8% (93)    | 28.5% (80)       | 24.1% (13)          | 0.619  | 0       |
| Chronic heart failure                      |                       | 27.5% (92)    | 25.3% (71)       | 38.9% (21)          | 0.046  | 0       |
| Ischemic heart disease                     |                       | 17.3% (58)    | 15.7% (44)       | 25.9% (14)          | 0.078  | 0       |
| Natural cardiac valve disease              |                       | 14.3% (48)    | 12.8% (36)       | 22.2% (12)          | 0.088  | 0       |
| Prosthetic heart valve disease             |                       | 3.0% (10)     | 2.8% (8)         | 3.7% (2)            | 0.667  | 0       |
| CIED                                       |                       | 4.8% (16)     | 5.3% (15)        | 1.9% (1)            | 0.334  | 0       |
| Chronic renal failure                      |                       | 21.5% (72)    | 19.9% (56)       | 29.6% (16)          | 0.146  | 0       |
| Hemodialysis                               |                       | 6.9% (23)     | 7.2% (20)        | 5.6% (3)            | 0.789  | 0       |
| Liver cirrhosis                            |                       | 3.0% (10)     | 2.5% (7)         | 5.6% (3)            | 0.209  | 0       |
| Solid organ malignancy                     |                       | 22.2% (74)    | 21.8% (61)       | 24.1% (13)          | 0.722  | 1       |
| Parenteral drug user                       |                       | 0.9% (3)      | 1.1% (3)         | 0                   | 1.000  | 1       |
| <b>Clinical presentation</b>               |                       |               |                  |                     |        |         |
| Acquisition                                | Nosocomial            | 53.1% (178)   | 53.7% (151)      | 50.0% (27)          | Ref.   | 0       |
|                                            | Healthcare associated | 17.6% (59)    | 16.4% (46)       | 24.1% (13)          | 0.224  |         |
|                                            | Community             | 29.3% (98)    | 29.9% (84)       | 25.9% (14)          | 0.843  |         |
| Source of infection                        | Catheter-related      | 35.5% (119)   | 37.0% (104)      | 27.8% (15)          | ref    | 0       |
|                                            | Primary-Unknown       | 24.5% (80)    | 20.8% (57)       | 43.8% (23)          | 0.001  |         |
|                                            | Other                 | 40.6% (136)   | 42.7% (120)      | 29.6% (16)          | 0.837  |         |
| Fever                                      |                       | 89.8% (300)   | 88.9% (249)      | 94.4% (51)          | 0.325  | 1       |
| Sepsis/septic shock                        |                       | 23.1% (77)    | 18.9% (53)       | 44.4% (24)          | <0.001 | 1       |
| Fever deferescence within 72 hours         |                       | 82.3% (276)   | 83.2% (234)      | 72.2% (39)          | 0.305  | 29      |
| Septic emboli                              |                       | 9.0% (30)     | 9.3% (26)        | 7.4% (4)            | 0.799  | 0       |
| Acute kidney injury                        |                       | 36.0% (119)   | 32.5% (90)       | 53.7% (29)          | 0.003  | 4       |
| Acute cardiac failure                      |                       | 15.0% (50)    | 12.5% (35)       | 27.8% (15)          | 0.007  | 2       |
| Pitt's bacteremia score                    |                       | 0 (0-1)       | 0 (0-1)          | 1 (0-3)             | <0.001 | 1       |
| SOFA                                       |                       | 2 (0-4)       | 1 (0-3)          | 4 (2-5)             | <0.001 | 2       |
| <b>Microbiology</b>                        |                       |               |                  |                     |        |         |
| Time to positivity                         |                       | 12 (10-16)    | 12 (10-16)       | 12 (9-17)           | 0.423  | 0       |
| Persistent bacteriemia                     |                       | 26.9% (71)    | 25.0% (58)       | 40.6% (13)          | 0.087  | 71      |
| Meticilin-resistant SAB                    |                       | 20.6% (69)    | 18.9% (53)       | 29.6% (16)          | 0.057  | 0       |
| <b>Diagnostic work-up</b>                  |                       |               |                  |                     |        |         |
| TTE and/or TEE                             |                       | 72.0% (237)   | 75.9% (211)      | 51.0% (26)          | <0.001 | 6       |
| TTE                                        |                       | 62.3% (207)   | 66.4% (186)      | 40.4% (21)          | 0.001  | 3       |
| TEE                                        |                       | 28.0% (11)    | 29.1% (81)       | 21.6% (11)          | 0.311  | 6       |
| PET-CT                                     |                       | 8.1% (27)     | 8.9% (25)        | 3.8% (2)            | 0.279  | 3       |
| Complicated SAB                            |                       | 28.1% (93)    | 26.1% (73)       | 39.2% (20)          | 0.042  | 4       |
| VIRSTA score (high risk)                   |                       | 49.0% (164)   | 45.2% (127)      | 68.5% (37)          | 0.002  | 0       |
| Source control necessary and not performed |                       | 11.3% (38)    | 10.7% (30)       | 14.8% (8)           | 0.252  | 0       |
